# Supplementary material for: MIIP functions as a novel ligand for ITGB3 to inhibit angiogenesis and tumorigenesis of triple-negative breast cancer
Source: PubMed Central journal article supplement (PMC9492696; doi:10.1038/s41419-022-05255-0), 2022-09-21

**Fig. 2A**

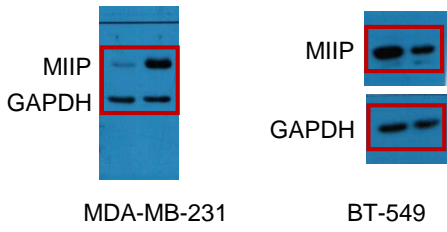

**Fig. 2F**

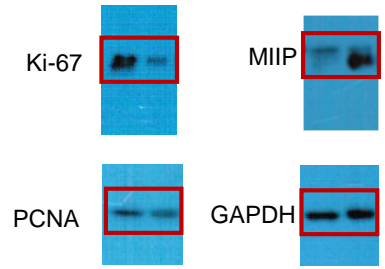

**Fig. 3D**

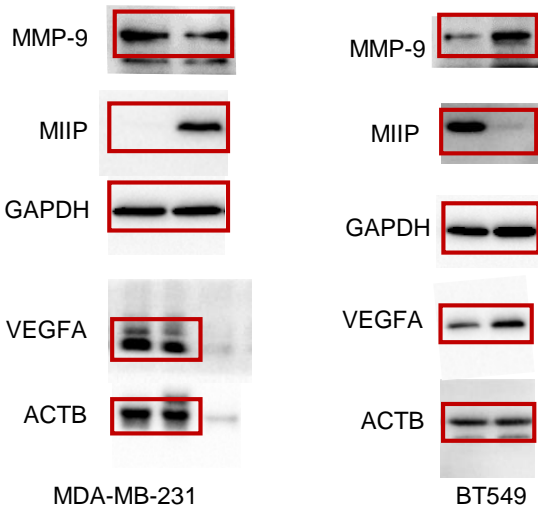

**Fig. 3E**

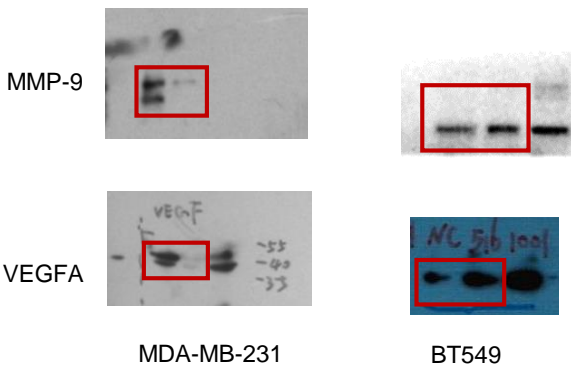

**Fig. 3K**

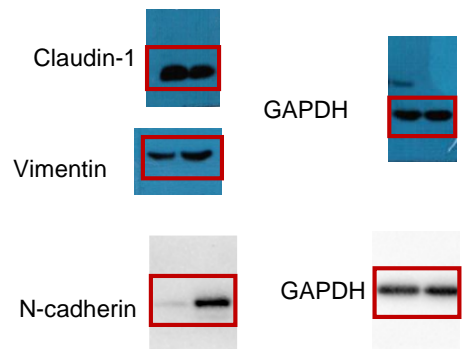

**Fig. 4B**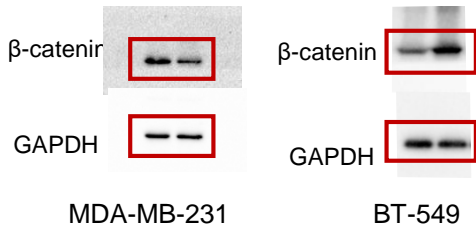**Fig. 4C**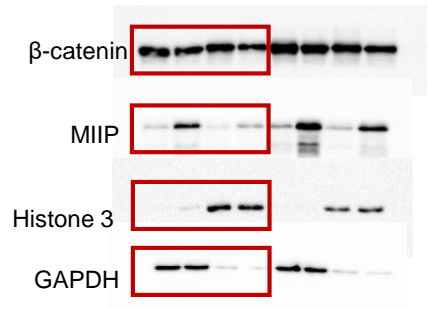**Fig. 4F**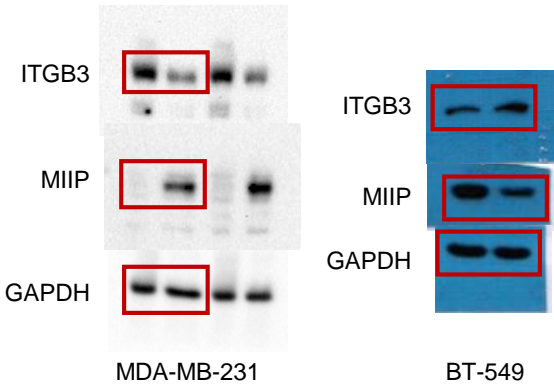**Fig. 4G**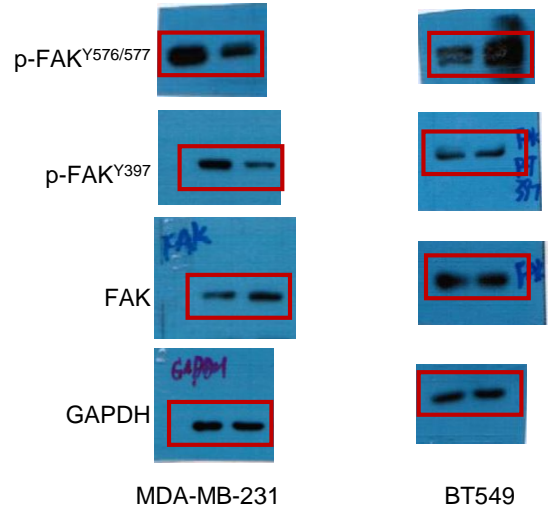**Fig. 4H**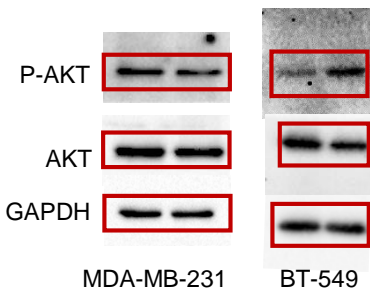**Fig. 4I**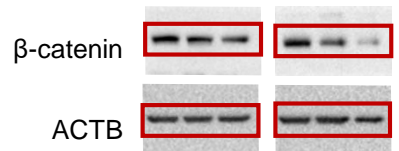**Fig. 4J**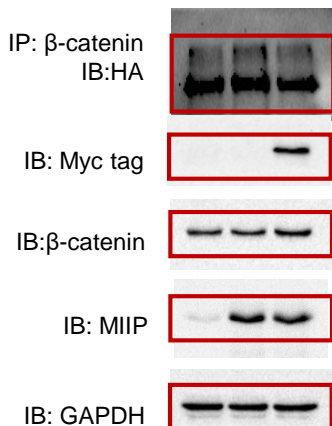**Fig. 4K**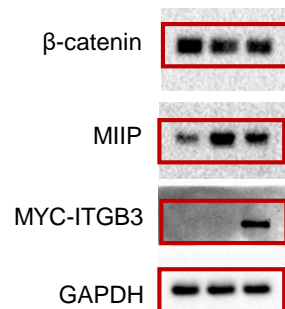

**Fig. 5B**

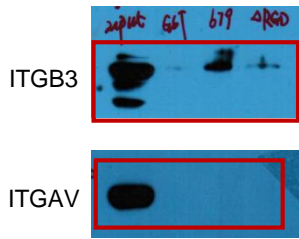

**Fig. 5C**

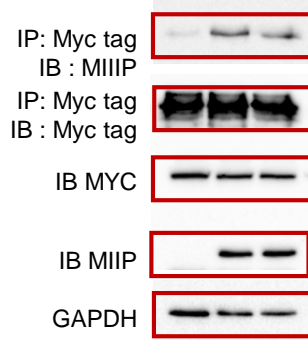

**Fig. 5D**

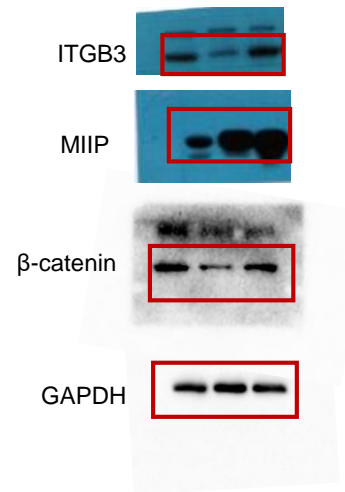

**Fig. 6G**

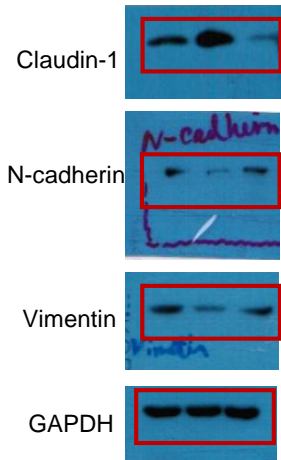

**Fig. 5E**

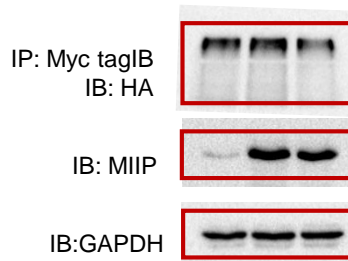

**Fig. 5F**

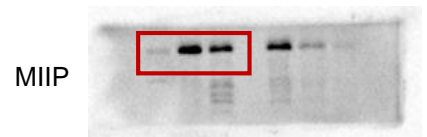

**Fig. 5G**

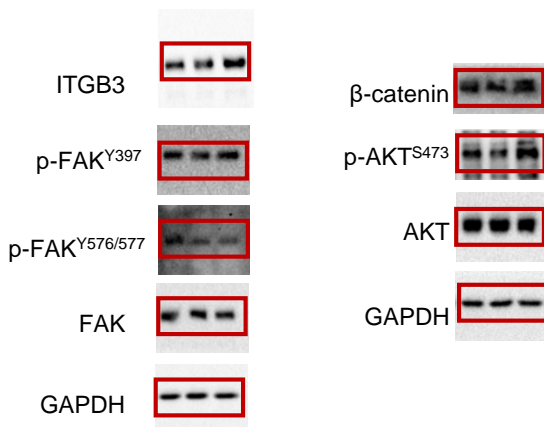

**Fig. 5H**

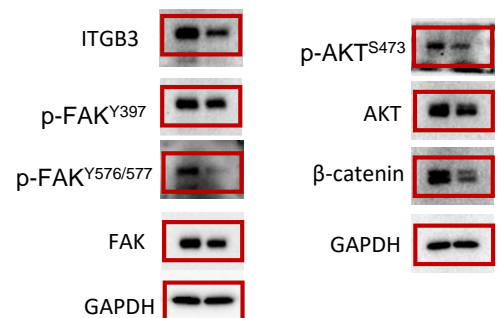

**Fig. S4B**

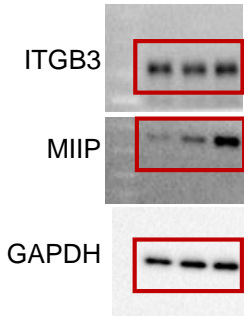

**Fig. S4C**

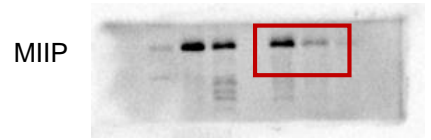

**Fig. S4D**

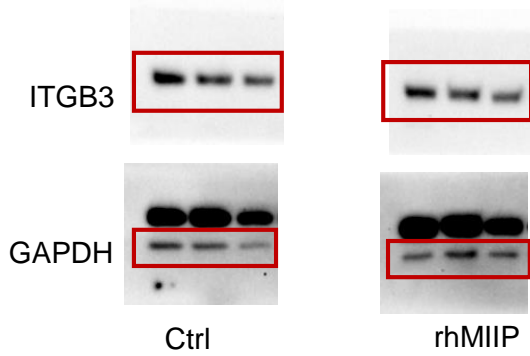

**Fig. S4E**

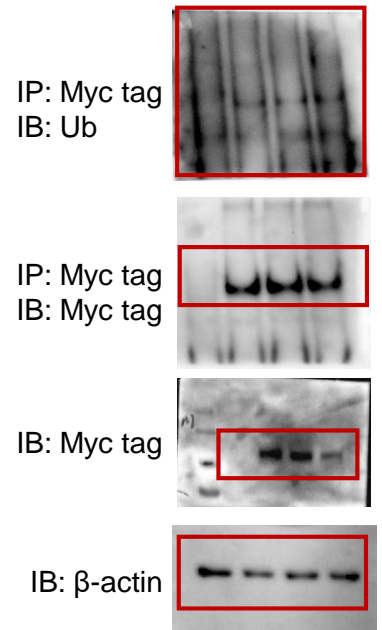

Supplement: 41419_2022_5255_MOESM2_ESM.pdf [file 41419_2022_5255_MOESM2_ESM.pdf]
